# Supplementary material for: Sodium glucose cotransporter 2 inhibitors and risk of major adverse cardiovascular events: multi-database retrospective cohort study
Source: PubMed Central journal article supplement — BMJ. 2020 Sep 23;370:m3342. doi: 10.1136/bmj.m3342 (PMC8009082; doi:10.1136/bmj.m3342), 2020-09-23
Supplement: filk055393.ww.pdf [file filk055393.ww.pdf]

## SUPPLEMENTARY MATERIAL

**Supplementary Table 1.** Start and end dates of study period at each participating site for the identification of the source population and date of first recorded SGLT2 inhibitor dispensing.

| Site             | Dates for identification of source population |                   |                               |
|------------------|-----------------------------------------------|-------------------|-------------------------------|
|                  | Start date                                    | End date          | Date of first SGLT2 inhibitor |
| Alberta          | January 1, 2008                               | March 31, 2017    | June 6, 2014                  |
| British Columbia | January 1, 2006                               | June 30, 2018     | June 3, 2014                  |
| Manitoba         | January 1, 2006                               | March 31, 2018    | June 9, 2014                  |
| Nova Scotia*     | November 1, 2016                              | June 30, 2018     | November 1, 2017              |
| Ontario          | January 1, 2006                               | March 31, 2018    | July 29, 2015                 |
| Quebec           | January 1, 2006                               | June 30, 2018     | September 4, 2014             |
| Saskatchewan     | February 13, 2008                             | June 30, 2018     | June 27, 2014                 |
| CPRD             | January 1, 2006                               | December 31, 2017 | February 4, 2013              |

Abbreviations: CPRD, Clinical Practice Research Datalink; SGLT2, sodium-glucose cotransporter 2.

\*Due to limitations in prescription drug data availability, patients were only included from November 1, 2017 to June 30, 2018.

**Supplementary Table 2.** Covariates included in the time-conditional propensity score model\*.

| Covariates                               | Comment (if applicable)*                                                                                                                   |
|------------------------------------------|--------------------------------------------------------------------------------------------------------------------------------------------|
| <b>Demographic</b>                       |                                                                                                                                            |
| Age                                      | Defined at cohort entry date                                                                                                               |
| Sex                                      |                                                                                                                                            |
| Socioeconomic status                     | A site-specific definition was applied                                                                                                     |
| <b>Diabetes duration</b>                 |                                                                                                                                            |
|                                          | Time since a patient's first diagnosis of diabetes or the time since their initiation of antidiabetic medication, whichever was longer     |
| <b>Comorbidities</b>                     |                                                                                                                                            |
| Alcohol-related disorders                |                                                                                                                                            |
| Aortic aneurysm                          |                                                                                                                                            |
| Atherosclerosis                          |                                                                                                                                            |
| Atrial fibrillation                      |                                                                                                                                            |
| Cancer                                   | Excluding non-melanoma skin cancer                                                                                                         |
| Cerebrovascular disease                  |                                                                                                                                            |
| Chronic obstructive pulmonary disease    |                                                                                                                                            |
| Cirrhosis                                |                                                                                                                                            |
| Coronary artery disease                  |                                                                                                                                            |
| Dementia                                 | Defined by a diagnosis of dementia (in the prior 3 years) or a prescription for cholinesterase inhibitors or memantine (in the prior year) |
| Diabetic nephropathy                     |                                                                                                                                            |
| Diabetic neuropathy                      |                                                                                                                                            |
| Diabetic retinopathy                     |                                                                                                                                            |
| Dialysis                                 | Defined using diagnosis and procedure codes                                                                                                |
| Dyslipidemia                             | Diagnosis of dyslipidemia (in the prior 3 years) or a prescription for a statin or other lipid lowering therapy (in the prior year)        |
| Heart failure                            |                                                                                                                                            |
| Hypertension                             |                                                                                                                                            |
| Hypoglycemia                             | Hospitalization with a diagnosis in any position in the prior 3 years                                                                      |
| Ischemic stroke                          |                                                                                                                                            |
| Myocardial infarction                    |                                                                                                                                            |
| Other kidney disease                     |                                                                                                                                            |
| Peripheral arterial disease              |                                                                                                                                            |
| <b>Use of medications</b>                |                                                                                                                                            |
| Acetylsalicylic acid                     |                                                                                                                                            |
| Aldosterone antagonists                  |                                                                                                                                            |
| Alpha-glucosidase inhibitors             |                                                                                                                                            |
| Angiotensin II receptor blockers         |                                                                                                                                            |
| Angiotensin-converting enzyme inhibitors |                                                                                                                                            |

| Covariates                                               | Comment (if applicable)*                                                                                                                                              |
|----------------------------------------------------------|-----------------------------------------------------------------------------------------------------------------------------------------------------------------------|
| Beta-blockers                                            |                                                                                                                                                                       |
| Calcium channel blockers                                 |                                                                                                                                                                       |
| Digitalis-like agents                                    |                                                                                                                                                                       |
| Insulin                                                  |                                                                                                                                                                       |
| Loop diuretics                                           |                                                                                                                                                                       |
| Meglitinides                                             |                                                                                                                                                                       |
| Metformin                                                |                                                                                                                                                                       |
| Non-acetylsalicylic acid antiplatelet drugs              |                                                                                                                                                                       |
| Nonsteroidal anti-inflammatory drugs                     |                                                                                                                                                                       |
| Oral anticoagulants                                      |                                                                                                                                                                       |
| Oral glucocorticoids                                     |                                                                                                                                                                       |
| Other diuretics                                          |                                                                                                                                                                       |
| Sulfonylureas                                            |                                                                                                                                                                       |
| Thiazide diuretics                                       |                                                                                                                                                                       |
| Thiazolidinediones                                       |                                                                                                                                                                       |
| No. of different classes of non-antidiabetic medications | Measured by drug class using site-specific approaches and assessed in the 365 days prior to and including study cohort entry.<br>Categorized as 0-1, 2-5, or $\geq 6$ |
| <b>Healthcare use</b>                                    |                                                                                                                                                                       |
| Number of inpatient hospitalizations                     | In the 365 days prior to and including study cohort entry<br>Categorized as 0, 1-2, or $\geq 3$                                                                       |
| Number of physician visits                               | Included inpatient and outpatient visits in the 365 days prior to study cohort entry<br>Categorized as 0-2, 3-5, or $\geq 6$                                          |
| <b>Additional CPRD covariates</b>                        |                                                                                                                                                                       |
| Blood pressure (mm Hg)                                   | Based on the last measurement before study cohort entry<br>Categorized as DBP <90 mm Hg and SBP <140 mm Hg, DBP $\geq 90$ mm Hg or SBP $\geq 140$ mm Hg, or missing   |
| Body mass index (kg/m <sup>2</sup> )                     | Based on the last measurement before study cohort entry<br>Categorized as <30 kg/m <sup>2</sup> , $\geq 30$ kg/m <sup>2</sup> , or missing                            |
| eGFR (mL/min/1.73 m <sup>2</sup> )                       | Based on the last measurement before study cohort entry<br>Categorized as <60, $\geq 60$ , or missing                                                                 |
| HbA1c (%)                                                | Based on the last measurement before study cohort entry<br>Categorized as $\leq 7$ , 7.1-8, >8, or missing                                                            |
| Race                                                     | Assessed ever before study cohort entry<br>Categorized as white, other, or missing                                                                                    |
| Smoking status                                           | Based on the last measurement before study cohort entry<br>Categorized as never, ever, or missing                                                                     |

Abbreviations: ATC, Anatomical Therapeutic Chemical; DBP, diastolic blood pressure; eGFR, estimated glomerular filtration rate; HbA1c, haemoglobin A1c; SBP, systolic blood pressure.

\*Unless otherwise specified, comorbidities were ascertained from hospitalization or physician claims data in the three years prior to study cohort entry. Medications and healthcare use were assessed in the year prior to study cohort entry. Comorbidities were measured using ICD-9-CM

for outpatient claims (except Ontario, which used ICD-8 codes, and CPRD, which used Read codes) and ICD-10-CA for hospitalization records, and procedures were defined using ICD-9-CM, Canadian Classification of Diagnostic, Therapeutic, and Surgical Procedures (CCP) and Canadian Classification of Health Interventions (CCI) + site-specific procedure codes.

**Supplementary Table 3.** Approach implemented to match SGLT2 inhibitor users to DPP-4 inhibitor users within each exposure risk set at each participating site.

| Site             | Without replacement | With replacement |
|------------------|---------------------|------------------|
| Alberta          |                     | ✓                |
| British Columbia |                     | ✓                |
| Manitoba         |                     | ✓                |
| Nova Scotia      |                     | ✓                |
| Ontario          | ✓                   |                  |
| Quebec           | ✓                   |                  |
| Saskatchewan*    |                     | ✓                |
| CPRD             | ✓                   |                  |

Abbreviations: CPRD: Clinical Practice Research Datalink.

\*Matching with replacement by randomly selecting a match using a caliper of  $\pm 0.2$  standard deviations of the ln (time-conditional propensity score).

**Supplementary Table 4.** Diagnoses codes used in outcome definitions.

| <b>Variable</b>       | <b>ICD-10-CA code</b>                                                                                                                                                                                                                                                                                                                                                                                                                                                                                                                                                                                                                                                                                                                                                           |
|-----------------------|---------------------------------------------------------------------------------------------------------------------------------------------------------------------------------------------------------------------------------------------------------------------------------------------------------------------------------------------------------------------------------------------------------------------------------------------------------------------------------------------------------------------------------------------------------------------------------------------------------------------------------------------------------------------------------------------------------------------------------------------------------------------------------|
| Myocardial infarction | I21.x Acute myocardial infarction                                                                                                                                                                                                                                                                                                                                                                                                                                                                                                                                                                                                                                                                                                                                               |
| Ischemic stroke       | I63.x Cerebral infarction<br>I64.x Stroke, not specified as haemorrhage or infarction                                                                                                                                                                                                                                                                                                                                                                                                                                                                                                                                                                                                                                                                                           |
| Cardiovascular death  | Defined using the following algorithm: <ul style="list-style-type: none"> <li>• In-hospital death with a cardiovascular diagnosis [ICD-10-CA: I00.x-I77.x (except I46.9)] recorded as the most responsible diagnosis or present on admission; or</li> <li>• Out-of-hospital death (including death in the emergency department if data available) without: <ul style="list-style-type: none"> <li>○ Documentation of cancer (ICD-9-CM: 140-172, 174-209; ICD-10-CA: C00-C43, C45-C97) in hospital, emergency department or physician claims data in the prior year; or</li> <li>○ Documentation of trauma (ICD-9-CM: 800-999, E000-E999; ICD-10-CA: S00-T98, V01-Y98) in hospital, emergency department or physician claims data in the preceding month.</li> </ul> </li> </ul> |
| Heart failure         | I11.0 Hypertensive heart disease with (congestive) heart failure<br>I13.0 Hypertensive heart and renal disease with (congestive) heart failure<br>I13.2 Hypertensive heart and renal disease with both (congestive) heart failure and renal failure<br>I50.x Heart failure                                                                                                                                                                                                                                                                                                                                                                                                                                                                                                      |

Abbreviations: ICD-10-CA, International Classification of Diseases, 10<sup>th</sup> revision, with Canadian Enhancement. ICD-9-CM, International Classification of Diseases, 9<sup>th</sup> revision.

**Supplementary Table 5.** Baseline non-antidiabetic medication use and healthcare use among users of SGLT2 inhibitors and their matched DPP-4 inhibitor users.\*

| Characteristic                                            | Pre-matching                      |                                   |       | Post-matching                     |                                   |       |
|-----------------------------------------------------------|-----------------------------------|-----------------------------------|-------|-----------------------------------|-----------------------------------|-------|
|                                                           | SGLT2 inhibitors<br>(n = 215,762) | DPP-4 inhibitors<br>(n = 215,762) | aSD   | SGLT2 inhibitors<br>(n = 209,867) | DPP-4 inhibitors<br>(n = 209,867) | aSD   |
| <b>Medications<sup>†</sup></b>                            |                                   |                                   |       |                                   |                                   |       |
| ACEI                                                      | 98,251 (45.5)                     | 96,807 (44.9)                     | 0.013 | 95,629 (45.6)                     | 94,973 (45.3)                     | 0.006 |
| Acetylsalicylic acid                                      | 38,835 (18.0)                     | 44,758 (20.7)                     | 0.070 | 37,258 (17.8)                     | 37,223 (17.7)                     | 0.000 |
| Aldosterone antagonists                                   | 6,506 (3.0)                       | 8,725 (4.0)                       | 0.056 | 6,259 (3.0)                       | 6,068 (2.9)                       | 0.005 |
| ARB                                                       | 69,506 (32.2)                     | 69,133 (32.0)                     | 0.004 | 67,320 (32.1)                     | 66,996 (31.9)                     | 0.003 |
| Beta-blockers                                             | 61,254 (28.4)                     | 72,222 (33.5)                     | 0.110 | 59,531 (28.4)                     | 59,009 (28.1)                     | 0.006 |
| Calcium channel blockers                                  | 65,977 (30.6)                     | 76,133 (35.3)                     | 0.100 | 64,200 (30.6)                     | 64,322 (30.6)                     | 0.001 |
| Cholinesterase inhibitors or memantine                    | 1,291 (0.6)                       | 5,108 (2.4)                       | 0.147 | 1,282 (0.6)                       | 1,366 (0.7)                       | 0.005 |
| Digitalis-like agents                                     | 2,708 (1.3)                       | 4,766 (2.2)                       | 0.073 | 2,631 (1.3)                       | 2,702 (1.3)                       | 0.003 |
| Loop diuretics                                            | 17,812 (8.3)                      | 32,212 (14.9)                     | 0.210 | 17,285 (8.2)                      | 17,530 (8.4)                      | 0.004 |
| Non-acetylsalicylic acid antiplatelet drugs               | 14,722 (6.8)                      | 18,150 (8.4)                      | 0.060 | 14,279 (6.8)                      | 13,879 (6.6)                      | 0.008 |
| Nonsteroidal anti-inflammatory drugs                      | 42,104 (19.5)                     | 36,759 (17.0)                     | 0.064 | 40,816 (19.4)                     | 40,054 (19.1)                     | 0.009 |
| Oral anticoagulants                                       | 13,989 (6.5)                      | 21,338 (9.9)                      | 0.124 | 13,610 (6.5)                      | 13,874 (6.6)                      | 0.005 |
| Oral glucocorticoids                                      | 13,486 (6.3)                      | 16,761 (7.8)                      | 0.059 | 13,083 (6.2)                      | 13,149 (6.3)                      | 0.001 |
| Other diuretics                                           | 20,347 (9.4)                      | 19,631 (9.1)                      | 0.011 | 19,739 (9.4)                      | 19,766 (9.4)                      | 0.000 |
| Other lipid lowering therapy                              | 24,760 (11.5)                     | 21,302 (9.9)                      | 0.052 | 23,879 (11.4)                     | 22,185 (10.6)                     | 0.026 |
| Statins                                                   | 166,157 (77.0)                    | 164,652 (76.3)                    | 0.016 | 161,370 (76.9)                    | 160,529 (76.5)                    | 0.009 |
| Thiazide diuretics                                        | 55,353 (25.7)                     | 54,213 (25.1)                     | 0.012 | 53,776 (25.6)                     | 53,343 (25.4)                     | 0.005 |
| No. of different classes of non anti-diabetic medications |                                   |                                   |       |                                   |                                   |       |
| 0-1                                                       | 10,228 (4.7)                      | 9,107 (4.2)                       | 0.025 | 9,962 (4.7)                       | 10,322 (4.9)                      | 0.008 |
| 2-5                                                       | 67,205 (31.1)                     | 57,102 (26.5)                     | 0.104 | 65,731 (31.3)                     | 66,311 (31.6)                     | 0.006 |
| ≥6                                                        | 138,329 (64.1)                    | 149,553 (69.3)                    | 0.111 | 134,174 (63.9)                    | 133,234 (63.5)                    | 0.009 |

| Characteristic                    | Pre-matching                      |                                   |       | Post-matching                     |                                   |       |
|-----------------------------------|-----------------------------------|-----------------------------------|-------|-----------------------------------|-----------------------------------|-------|
|                                   | SGLT2 inhibitors<br>(n = 215,762) | DPP-4 inhibitors<br>(n = 215,762) | aSD   | SGLT2 inhibitors<br>(n = 209,867) | DPP-4 inhibitors<br>(n = 209,867) | aSD   |
| <b>Healthcare use<sup>†</sup></b> |                                   |                                   |       |                                   |                                   |       |
| Inpatient hospitalizations        |                                   |                                   |       |                                   |                                   |       |
| 0                                 | 183,223 (84.9)                    | 167,437 (77.6)                    | 0.188 | 178,223 (84.9)                    | 177,700 (84.7)                    | 0.007 |
| 1-2                               | 30,037 (13.9)                     | 41,973 (19.5)                     | 0.149 | 29,226 (13.9)                     | 29,567 (14.1)                     | 0.005 |
| ≥3                                | 2,502 (1.2)                       | 6,352 (2.9)                       | 0.126 | 2,418 (1.2)                       | 2,600 (1.2)                       | 0.008 |
| Number of physician visits        |                                   |                                   |       |                                   |                                   |       |
| 0-2                               | 15,467 (7.2)                      | 17,559 (8.1)                      | 0.036 | 15,009 (7.2)                      | 15,281 (7.3)                      | 0.005 |
| 3-5                               | 32,803 (15.2)                     | 29,570 (13.7)                     | 0.043 | 32,078 (15.3)                     | 31,677 (15.1)                     | 0.005 |
| ≥6                                | 167,492 (77.6)                    | 168,633 (78.2)                    | 0.013 | 162,780 (77.6)                    | 162,909 (77.6)                    | 0.001 |

Abbreviations: ACEI, angiotensin-converting enzyme inhibitors; ARB, angiotensin II receptor blockers; DPP-4, dipeptidyl peptidase-4; GLP-1, glucagon-like peptide-1; aSD, absolute value of the standardized difference; SGLT2, sodium-glucose cotransporter 2.

\*Data are presented as n (%). SGLT2 inhibitors patients were matched to DPP-4 inhibitors patients from their exposure set (defined on level of antidiabetic therapy, prior use of GLP-1 receptor agonists, time on DPP-4 inhibitors for prevalent new users and calendar time) on time-conditional propensity score.

<sup>†</sup>Medications and healthcare use were assessed in the year before cohort entry.



**Supplementary Table 6.** Additional baseline characteristics of new users of SGLT2 inhibitors and their matched DPP-4 users in the CPRD.\*

| Characteristics                  | Pre-matching                    |                                 |       | Post-matching                   |                                 |       |
|----------------------------------|---------------------------------|---------------------------------|-------|---------------------------------|---------------------------------|-------|
|                                  | SGLT2 inhibitors<br>(n = 6,204) | DPP-4 inhibitors<br>(n = 6,204) | aSD   | SGLT2 inhibitors<br>(n = 5,423) | DPP-4 inhibitors<br>(n = 5,423) | aSD   |
| <b>Blood pressure</b>            |                                 |                                 |       |                                 |                                 |       |
| DBP <90 mm Hg and SBP <140 mm Hg | 4,010 (64.6)                    | 4,183 (67.4)                    | 0.059 | 3,503 (64.6)                    | 3,534 (65.2)                    | 0.012 |
| DPB ≥90 mm Hg or SBP ≥140 mm Hg  | 2,185 (35.2)                    | 2,007 (32.4)                    | 0.061 | 1,912 (35.3)                    | 1,883 (34.7)                    | 0.011 |
| Missing                          | 9 (0.1)                         | 14 (0.2)                        | 0.019 | 8 (0.1)                         | 6 (0.1)                         | 0.010 |
| <b>Body mass index</b>           |                                 |                                 |       |                                 |                                 |       |
| <30 kg/m <sup>2</sup>            | 1,612 (26.0)                    | 2,443 (39.4)                    | 0.289 | 1,533 (28.3)                    | 1,719 (31.7)                    | 0.075 |
| ≥30 kg/m <sup>2</sup>            | 4,570 (73.7)                    | 3,723 (60.0)                    | 0.293 | 3,873 (71.4)                    | 3,680 (67.9)                    | 0.078 |
| Unknown                          | 22 (0.4)                        | 38 (0.6)                        | 0.037 | 17 (0.3)                        | 24 (0.4)                        | 0.021 |
| <b>eGFR</b>                      |                                 |                                 |       |                                 |                                 |       |
| <60 mL/min/1.73m <sup>2</sup>    | 325 (5.2)                       | 1,757 (28.3)                    | 0.649 | 285 (5.3)                       | 540 (10.0)                      | 0.178 |
| ≥60 mL/min/1.73m <sup>2</sup>    | 5,869 (94.6)                    | 4,437 (71.5)                    | 0.647 | 5,131 (94.6)                    | 4,876 (89.9)                    | 0.177 |
| Missing                          | 10 (0.2)                        | 10 (0.2)                        | 0.000 | 7 (0.1)                         | 7 (0.1)                         | 0.000 |
| <b>HbA1c</b>                     |                                 |                                 |       |                                 |                                 |       |
| ≤7 %                             | 210 (3.4)                       | 1,001 (16.1)                    | 0.440 | 183 (3.4)                       | 223 (4.1)                       | 0.039 |
| 7.1-8 %                          | 1,120 (18.1)                    | 1,617 (26.1)                    | 0.194 | 1,050 (19.4)                    | 1,059 (19.5)                    | 0.004 |
| >8 %                             | 4,832 (77.9)                    | 3,540 (57.1)                    | 0.456 | 4,154 (76.6)                    | 4,100 (75.6)                    | 0.023 |
| Missing                          | 42 (0.7)                        | 46 (0.7)                        | 0.008 | 36 (0.7)                        | 41 (0.8)                        | 0.011 |
| <b>Race</b>                      |                                 |                                 |       |                                 |                                 |       |
| White                            | 4,582 (73.9)                    | 4,645 (74.9)                    | 0.023 | 3,968 (73.2)                    | 3,954 (72.9)                    | 0.006 |
| Other                            | 578 (9.3)                       | 708 (11.4)                      | 0.069 | 533 (9.8)                       | 574 (10.6)                      | 0.025 |
| Missing                          | 1,044 (16.8)                    | 851 (13.7)                      | 0.087 | 922 (17.0)                      | 895 (16.5)                      | 0.013 |
| <b>Smoking status</b>            |                                 |                                 |       |                                 |                                 |       |
| Never                            | 2,474 (39.9)                    | S                               | 0.015 | 2,166 (39.9)                    | 2,108 (38.9)                    | 0.022 |
| Ever                             | 3,723 (60.0)                    | 3,678 (59.3)                    | 0.015 | 3,251 (59.9)                    | 3,308 (61.0)                    | 0.022 |

| Characteristics | Pre-matching                    |                                 |       | Post-matching                   |                                 |       |
|-----------------|---------------------------------|---------------------------------|-------|---------------------------------|---------------------------------|-------|
|                 | SGLT2 inhibitors<br>(n = 6,204) | DPP-4 inhibitors<br>(n = 6,204) | aSD   | SGLT2 inhibitors<br>(n = 5,423) | DPP-4 inhibitors<br>(n = 5,423) | aSD   |
| Missing         | 7 (0.1)                         | S                               | 0.010 | 6 (0.1)                         | 7 (0.1)                         | 0.005 |

Abbreviations: DBP, diastolic blood pressure; DPP-4, dipeptidyl peptidase-4; CPRD: Clinical Practice Research Datalink; eGFR, estimated glomerular filtration rate; GLP-1, glucagon-like peptide-1; HbA1c, hemoglobin A1c; SBP, systolic blood pressure; aSD, absolute value of the standardized difference; SGLT2, sodium-glucose cotransporter 2.

\*Data are presented as n (%). Cells that contained a value <6 were suppressed due to privacy restriction and are presented as S. SGLT2 inhibitors patients were matched to DPP-4 inhibitors patients from their exposure set (defined on level of antidiabetic therapy, prior use of GLP-1 receptor agonists, time on DPP-4 inhibitors for prevalent new users and calendar time) on time-conditional propensity score. The assessment of body mass index, smoking status, blood pressure, eGFR and HbA1c was based on the last measurement before study cohort entry, and race was assessed ever before. Missing data were included in regression models through the use of an indicator variable.

**Supplementary Table 7.** Number of events, patients, and person-years of follow-up and crude incidence rates overall and by site for MACE.

|                         | <b>No. of events</b> | <b>No. of patients</b> | <b>No. of person-years</b> | <b>Crude incidence rate (per 1,000 person-years)</b> |
|-------------------------|----------------------|------------------------|----------------------------|------------------------------------------------------|
| <b>Overall</b>          |                      |                        |                            |                                                      |
| SGLT2 inhibitors        | 2,146                | 209,867                | 188,782                    | 11.4                                                 |
| DPP-4 inhibitors        | 3,001                | 209,867                | 181,733                    | 16.5                                                 |
| <b>Alberta</b>          |                      |                        |                            |                                                      |
| SGLT2 inhibitors        | 140                  | 26,186                 | 18,443                     | 7.6                                                  |
| DPP-4 inhibitors        | 159                  | 26,186                 | 16,512                     | 9.6                                                  |
| <b>British Columbia</b> |                      |                        |                            |                                                      |
| SGLT2 inhibitors        | 371                  | 44,043                 | 41,764                     | 8.9                                                  |
| DPP-4 inhibitors        | 429                  | 44,043                 | 39,646                     | 10.8                                                 |
| <b>Manitoba</b>         |                      |                        |                            |                                                      |
| SGLT2 inhibitors        | 94                   | 12,204                 | 11,253                     | 8.4                                                  |
| DPP-4 inhibitors        | 121                  | 12,204                 | 10,006                     | 12.1                                                 |
| <b>Nova Scotia</b>      |                      |                        |                            |                                                      |
| SGLT2 inhibitors        | 6                    | 1,119                  | 335                        | 17.9                                                 |
| DPP-4 inhibitors        | S                    | 1,119                  | S                          | 9.2                                                  |
| <b>Ontario</b>          |                      |                        |                            |                                                      |
| SGLT2 inhibitors        | 897                  | 65,556                 | 56,312                     | 15.9                                                 |
| DPP-4 inhibitors        | 1,472                | 65,556                 | 58,694                     | 25.1                                                 |
| <b>Quebec</b>           |                      |                        |                            |                                                      |
| SGLT2 inhibitors        | 480                  | 44,504                 | 45,797                     | 10.5                                                 |
| DPP-4 inhibitors        | 592                  | 44,504                 | 42,184                     | 14.0                                                 |
| <b>Saskatchewan</b>     |                      |                        |                            |                                                      |
| SGLT2 inhibitors        | 103                  | 10,832                 | 10,172                     | 10.1                                                 |
| DPP-4 inhibitors        | 152                  | 10,832                 | 10,676                     | 14.2                                                 |
| <b>CPRD</b>             |                      |                        |                            |                                                      |
| SGLT2 inhibitors        | 55                   | 5,423                  | 4,706                      | 11.7                                                 |
| DPP-4 inhibitors        | 76                   | 5,423                  | 4,016                      | 18.9                                                 |

Abbreviations: SGLT2, sodium-glucose cotransporter 2; DPP-4, dipeptidyl peptidase-4; IR, incidence rate; CI, confidence interval; NA, not applicable; CPRD, Clinical Practice Research Datalink; MACE, major adverse cardiovascular events.

Cells that contained a value <6 were suppressed due to privacy restriction and are presented as S.

**Supplementary Table 8.** Summary of results of stratified analyses of pooled adjusted hazard ratios (95% CI) for MACE, its components, and all-cause mortality for SGLT2 inhibitor use versus DPP-4 inhibitor use.

|                       | <b>History of cardiovascular disease</b>    |                      |                                 |                      |
|-----------------------|---------------------------------------------|----------------------|---------------------------------|----------------------|
|                       | <b>Yes (n=110,184)*</b>                     |                      | <b>No (n=309,550)*</b>          |                      |
|                       | <b>Adjusted HR<br/>(95% CI)<sup>†</sup></b> | <b>I<sup>2</sup></b> | <b>Adjusted HR<br/>(95% CI)</b> | <b>I<sup>2</sup></b> |
| MACE                  | 0.71 (0.59 to 0.86)                         | 67%                  | 0.78 (0.69 to 0.88)             | 40%                  |
| Myocardial infarction | 0.84 (0.69 to 1.03)                         | 42%                  | 0.86 (0.76 to 0.98)             | 3%                   |
| Ischemic stroke       | 0.90 (0.63 to 1.28)                         | 55%                  | 0.82 (0.63 to 1.09)             | 45%                  |
| Cardiovascular death  | 0.51 (0.40 to 0.65)                         | 39%                  | 0.74 (0.57 to 0.97)             | 67%                  |
| All-cause mortality   | 0.53 (0.48 to 0.58)                         | 0%                   | 0.69 (0.57 to 0.83)             | 68%                  |

Abbreviations: CI, confidence interval; HR, hazard ratio; MACE, major adverse cardiovascular events.

\*There were 55,211 SGLT2 inhibitor users and 54,973 DPP-4 inhibitor users with a previous history of cardiovascular disease. There were 154,656 SGLT2 inhibitor users and 154,894 DPP-4 inhibitor users with no previous history of cardiovascular disease.

<sup>†</sup>Outcome models were adjusted for age (continuous), sex, diabetes duration (continuous), and deciles of time-conditional propensity score.

Note: Nova Scotia had zero events in one of the exposure groups and thus was not included in the MACE (history of cardiovascular disease strata), myocardial infarction, ischemic stroke, cardiovascular death, and all-cause mortality analyses.

**Supplementary Table 9.** Summary of the CPRD results for the study outcomes for SGLT2 inhibitor use versus DPP-4 inhibitor use with and without the inclusion of additional covariates in the time-conditional propensity score.\*

| Outcome               | Adjusted HR (95% CI)*                            |                                         |                               |
|-----------------------|--------------------------------------------------|-----------------------------------------|-------------------------------|
|                       | With additional clinical covariates <sup>†</sup> | With addition of eGFR only <sup>‡</sup> | Without additional covariates |
| MACE                  | 0.77 (0.54 to 1.10)                              | 0.77 (0.54 to 1.11)                     | 0.69 (0.48 to 1.00)           |
| Myocardial infarction | 0.75 (0.44 to 1.30)                              | 0.86 (0.49 to 1.50)                     | 0.64 (0.37 to 1.12)           |
| Ischemic stroke       | 1.15 (0.51 to 2.58)                              | 0.93 (0.43 to 2.02)                     | 1.63 (0.66 to 4.05)           |
| Cardiovascular death  | 0.59 (0.33 to 1.05)                              | 0.48 (0.26 to 0.89)                     | 0.48 (0.26 to 0.89)           |
| All-cause mortality   | 0.67 (0.42 to 1.06)                              | 0.57 (0.32 to 1.02)                     | 0.64 (0.39 to 1.04)           |
| Heart failure         | 0.58 (0.21 to 1.59)                              | 0.32 (0.10 to 0.97)                     | 0.57 (0.19 to 1.70)           |

Abbreviations: CI, confidence interval; CPRD, Clinical Practice Research Datalink; DPP-4, dipeptidyl peptidase-4; eGFR, estimated glomerular filtration rate; GLP-1, glucagon-like peptide-1; HbA1c, hemoglobin A1c; HR, hazard ratios; MACE, major adverse cardiovascular events; SGLT2, sodium-glucose cotransporter 2.

\*Outcome models were adjusted for age (continuous), sex, diabetes duration (continuous), and deciles of time-conditional propensity score.

<sup>†</sup>Additional clinical covariates included in the CPRD time-conditional propensity score were body mass index, smoking status, race, blood pressure, eGFR, and HbA1c.

<sup>‡</sup> The CPRD time-conditional propensity score included eGFR in addition to covariates included at all sites.

**Supplementary Figure 1.** Adjusted hazard ratios (95% CI) of myocardial infarction associated with SGLT2 inhibitor use compared with DPP-4 inhibitor use\*.

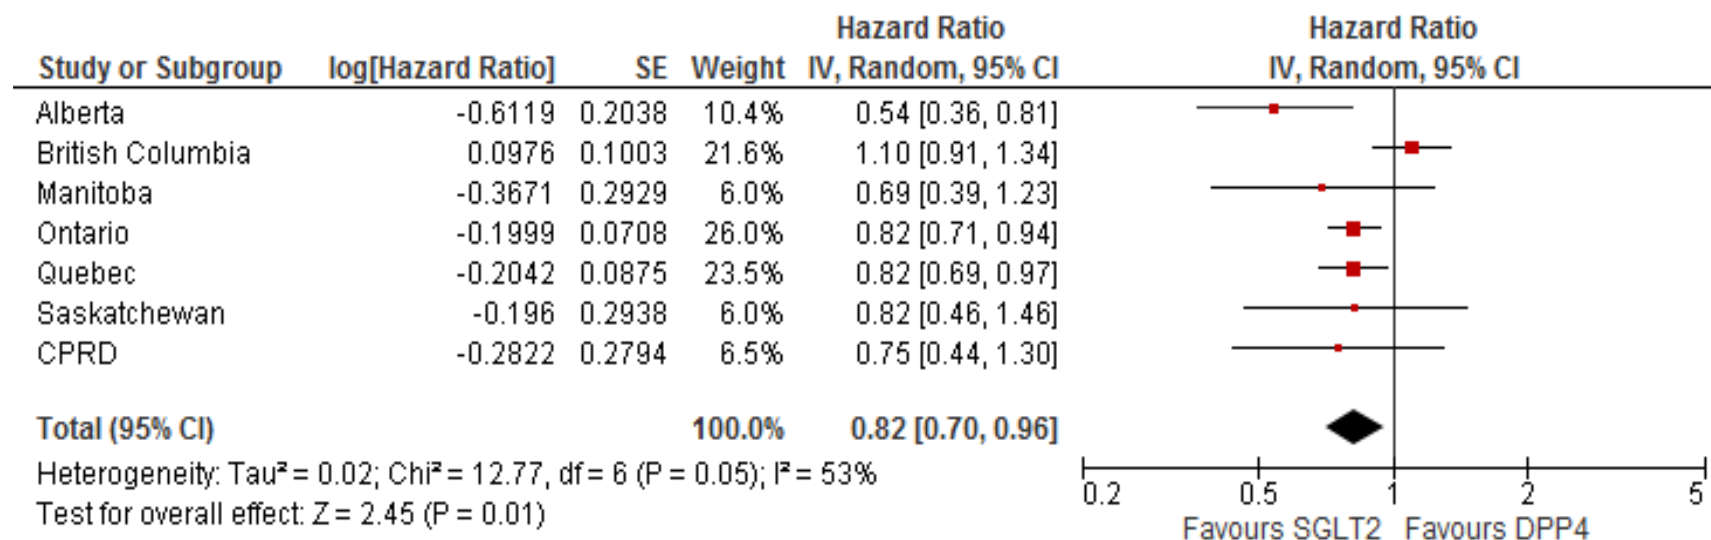

Abbreviations: CI, confidence interval; CPRD: Clinical Practice Research Datalink; DPP-4, dipeptidyl peptidase-4; HR, hazard ratio; SGLT2, sodium-glucose cotransporter 2.

\*Outcome models were adjusted for age (continuous), sex, diabetes duration (continuous), and deciles of time-conditional propensity score.

Note: Nova Scotia had zero events in one of the exposure groups and thus was not included in this analysis.

**Supplementary Figure 2.** Adjusted hazard ratios (95% CI) of cardiovascular death associated with SGLT2 inhibitor use compared with DPP-4 inhibitor use\*.

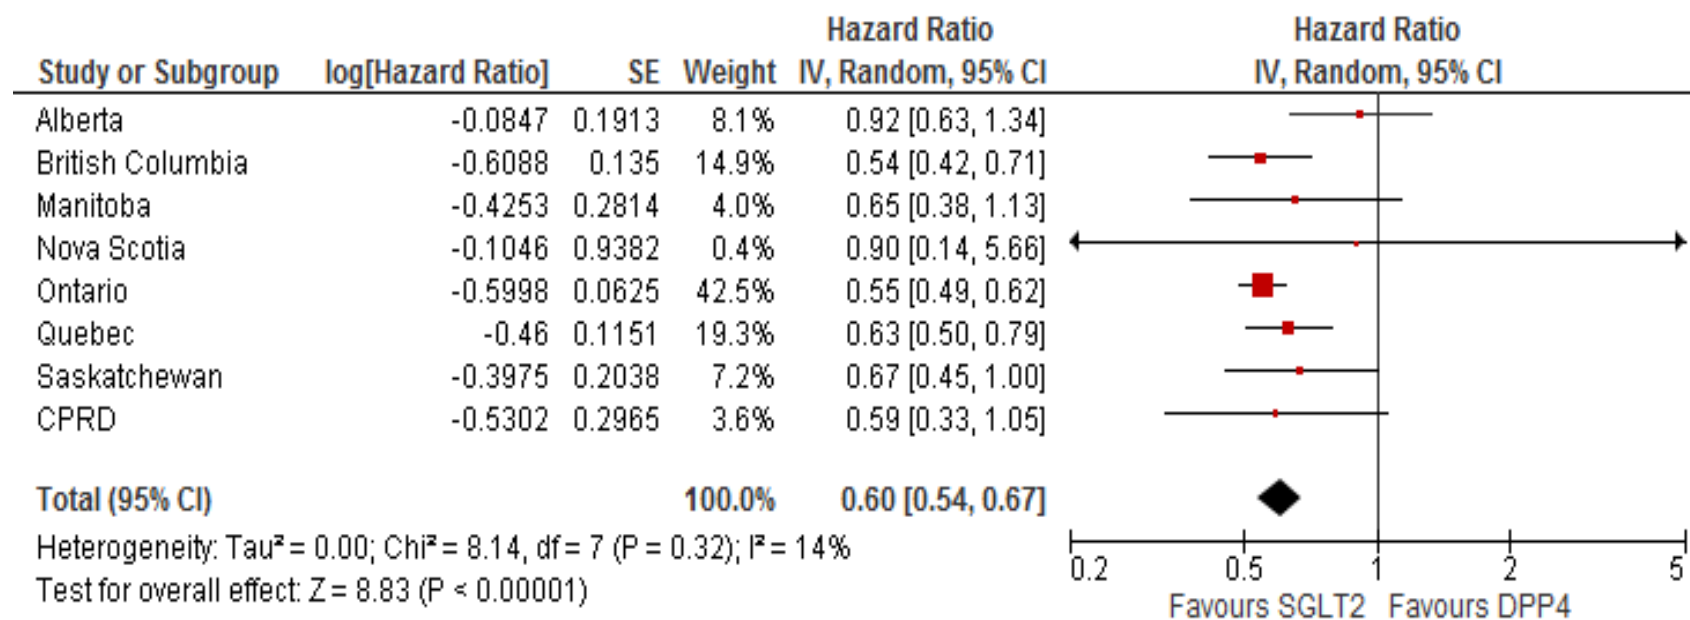

Abbreviations: CI, confidence interval; CPRD: Clinical Practice Research Datalink; DPP-4, dipeptidyl peptidase-4; HR, hazard ratio; SGLT2, sodium-glucose cotransporter 2.

\*Outcome models were adjusted for age (continuous), sex, diabetes duration (continuous), and deciles of time-conditional propensity score.

**Supplementary Figure 3.** Adjusted hazard ratios (95% CI) of ischemic stroke associated with SGLT2 inhibitor use compared with DPP-4 inhibitor use\*.

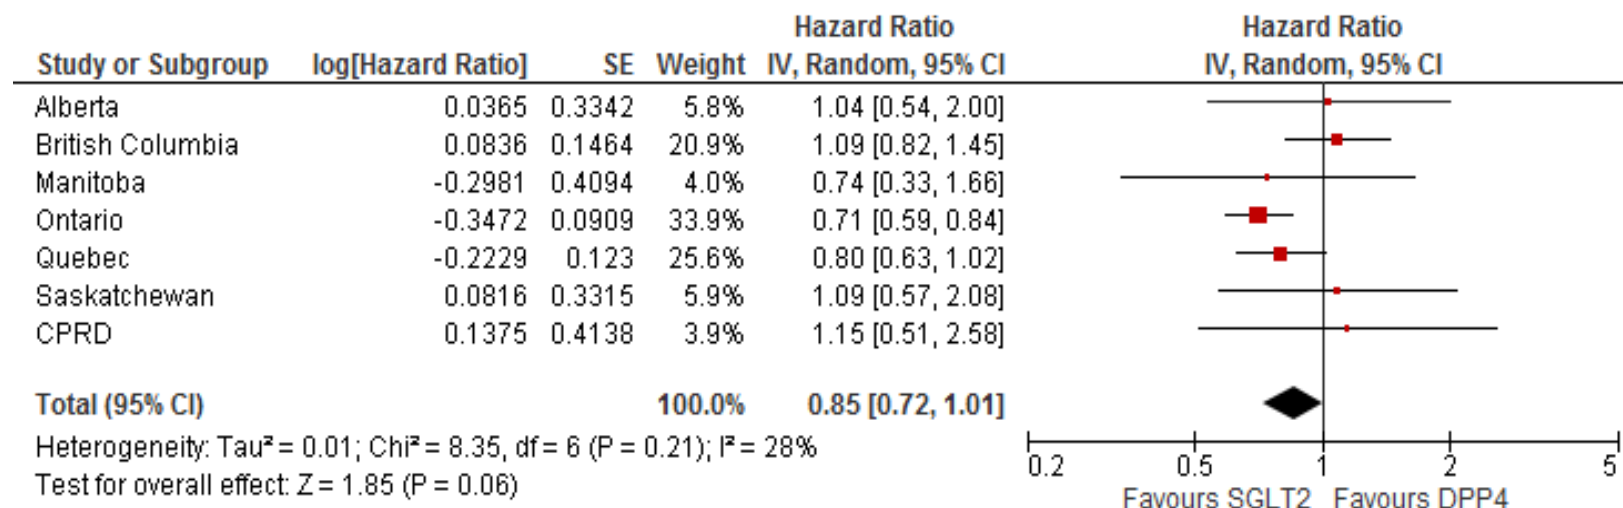

Abbreviations: CI, confidence interval; CPRD: Clinical Practice Research Datalink; DPP-4, dipeptidyl peptidase-4; HR, hazard ratio; SGLT2, sodium-glucose cotransporter 2.

\*Outcome models were adjusted for age (continuous), sex, diabetes duration (continuous), and deciles of time-conditional propensity score.

Note: Nova Scotia had zero events in one of the exposure groups and thus was not included in this analysis.



**Supplementary Figure 4.** Adjusted hazard ratios (95% CI) of all-cause mortality associated with SGLT2 inhibitor use compared with DPP-4 inhibitor use\*.

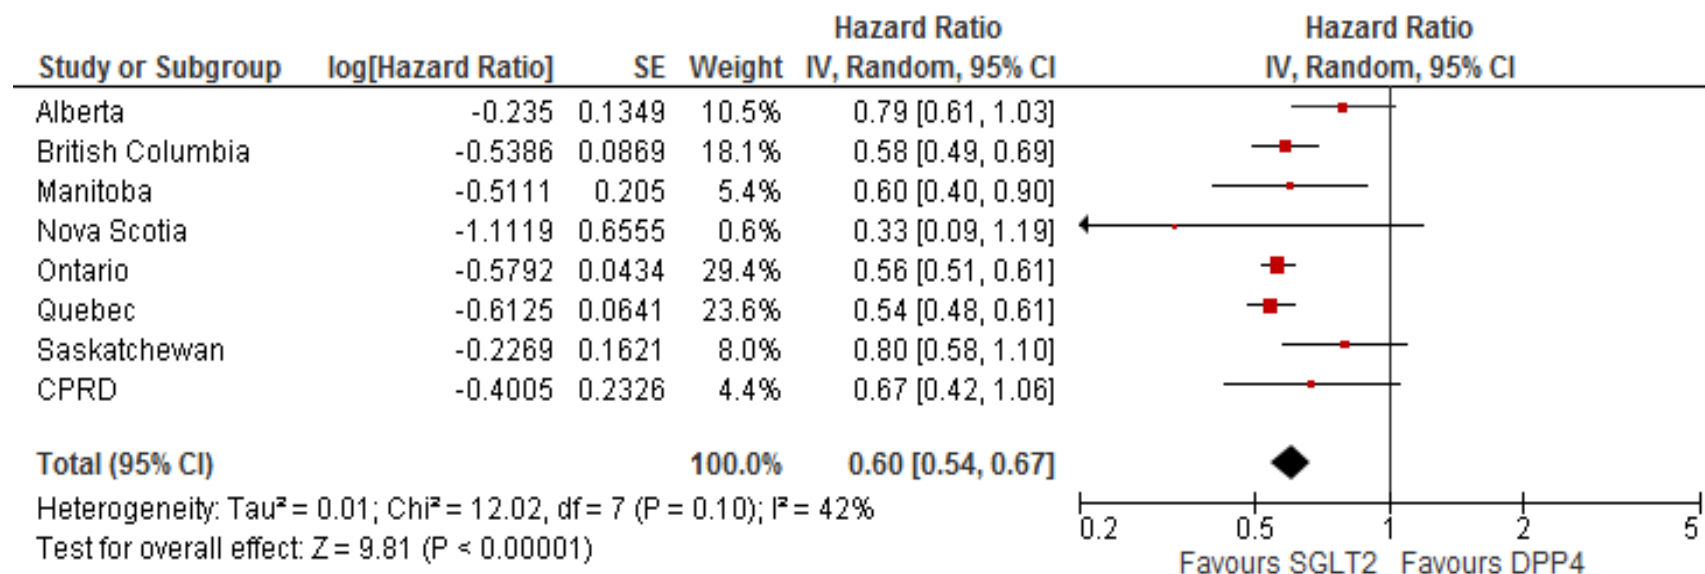

Abbreviations: CI, confidence interval; CPRD: Clinical Practice Research Datalink; DPP-4, dipeptidyl peptidase-4; HR, hazard ratio; SGLT2, sodium-glucose cotransporter 2.

\*Outcome models were adjusted for age (continuous), sex, diabetes duration (continuous), and deciles of time-conditional propensity score.

**Supplementary Figure 5.** Adjusted hazard ratios (95% CI) of MACE for SGLT2 inhibitor use versus with DPP-4 inhibitor use, stratified by duration of follow-up time .

Follow-up < 1 year:

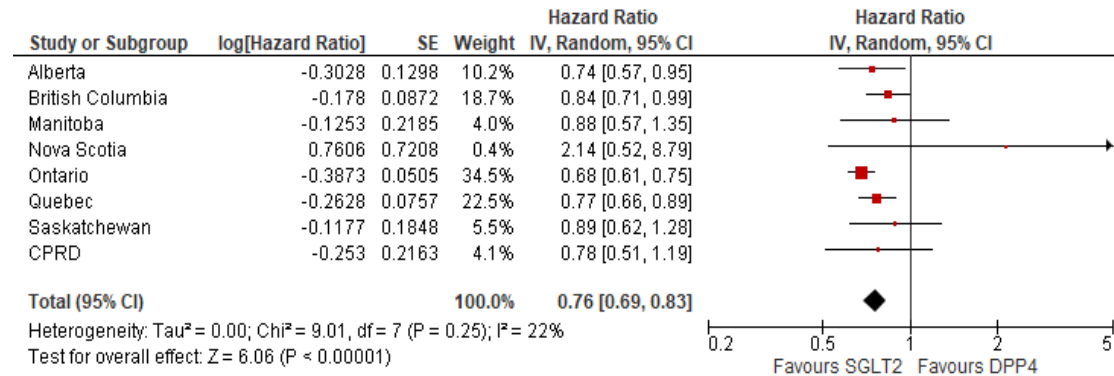

Follow-up >1 year:

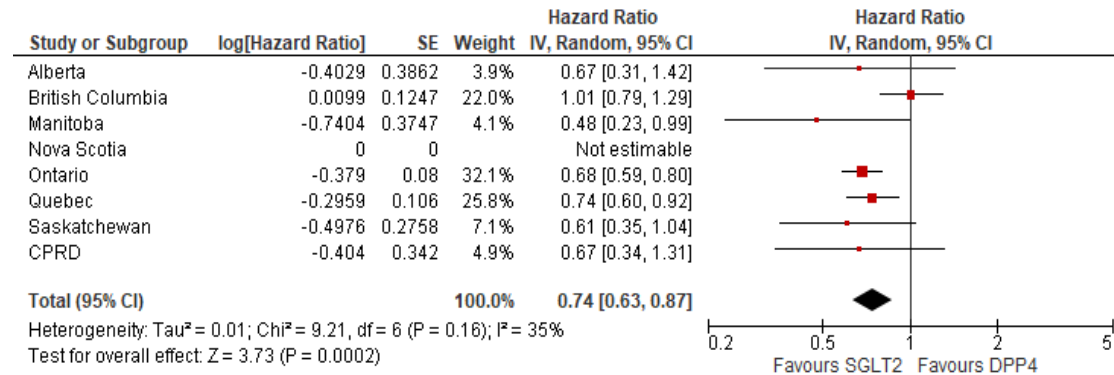

Abbreviations: CI, confidence interval; CPRD: Clinical Practice Research Datalink; DPP-4, dipeptidyl peptidase-4; HR, hazard ratio; MACE, major adverse cardiovascular events; SGLT2, sodium-glucose cotransporter 2.

\*Outcome models were adjusted for age (continuous), sex, diabetes duration (continuous), and deciles of time-conditional propensity score.

Note: Nova Scotia had zero events with follow-up >1 year and thus was not included in this strata.

**Supplementary Figure 6.** Rule out method to explore unmeasured confounding.

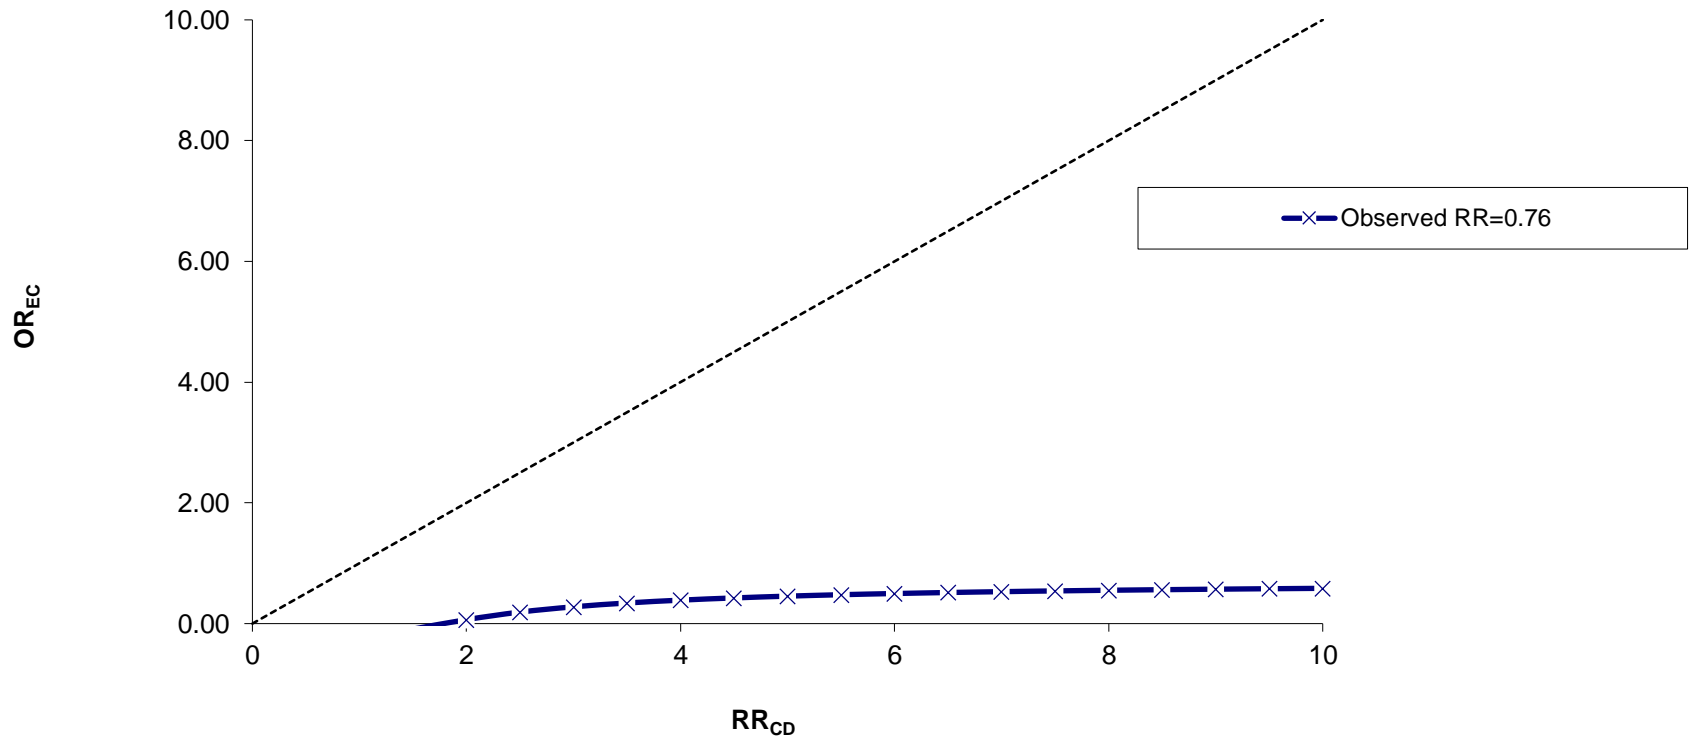

Abbreviations: OR<sub>EC</sub>: Odds ratio between exposure and confounder; RR<sub>CD</sub>: Relative risk between confounder and disease; RR: relative risk for association between exposure and outcome of interest.

Assuming a prevalence of the unmeasured confounder of 0.2, it would require an unmeasured confounder with an odds ratio between exposure and the confounder of <0.58 (and in most reasonable cases, substantially less than this) and a relative risk between the confounder and outcome >2 (and substantially higher in most cases) to explain the observed results of our primary analysis (HR: 0.76, 95% CI: 0.69 to 0.84).

Reference: Schneeweiss S. Sensitivity analysis and external adjustment for unmeasured confounders in epidemiologic database studies of therapeutics. *Pharmacoepidemiology and drug safety* 2006;15(5):291-303.
